# Supplementary material for: Solution processed single-emission layer white polymer light-emitting diodes with high color quality and high performance from a poly(N-vinyl)carbazole host
Source: Royal Society of Chemistry journal article supplement (doi:10.1039/c4cp06063f), 2015-01-01

## Solution Processed Single-Emissive Layer White Polymer Light-Emitting Diodes with High Color Quality and High Performance from Poly(N-vinyl)carbazole Host

Shang-hui Ye,<sup>a,\*</sup> Tian-qing Hu,<sup>a</sup> Zhou Zhou,<sup>a</sup> Min Yang,<sup>a</sup> Mei-han Quan,<sup>a</sup> Qun-bo Mei,<sup>a</sup> Bang-cheng Zhai,<sup>a</sup> Zhen-hong Jia,<sup>a</sup> Wen-yong Lai,<sup>a</sup> Wei Huang<sup>a,b,\*</sup>

Fig. S1. Transient photoluminescent spectra of the blue, green, orange, and red phosphors singly doped in PVK film excited at 344 nm.

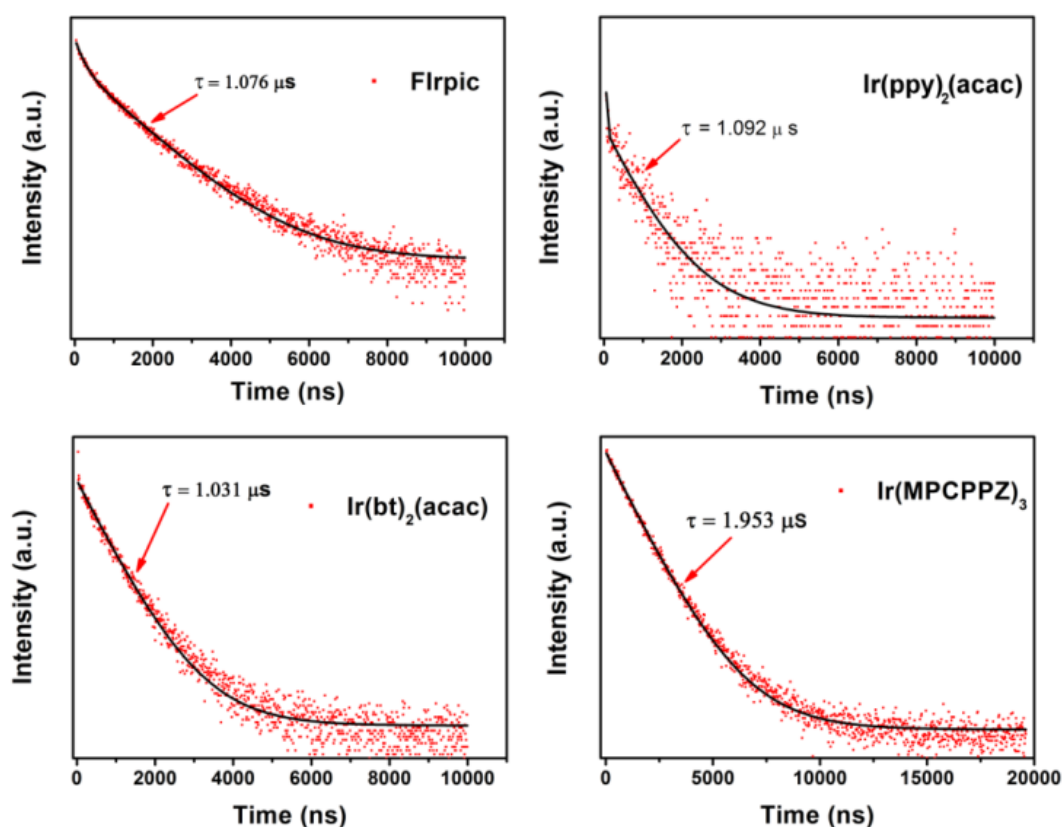

Supplement: c4cp06063f1.pdf [file c4cp06063f1.pdf]
